# Supplementary material for: Insights into the molecular mechanism underlying CD4-dependency and neutralization sensitivity of HIV-1: a comparative molecular dynamics study on gp120s from isolates with different phenotypes
Source: Royal Society of Chemistry journal article supplement (doi:10.1039/c8ra00425k), 2018-01-01
Supplement: c8ra00425k1.pdf [file c8ra00425k1.pdf]

Supplementary information

**Insights into molecular mechanism underlying CD4 dependency and neutralization sensitivity of HIV-1: A comparative molecular dynamics study on gp120s from isolates with different phenotypes**

Yi Li,<sup>†a</sup> Lei Deng,<sup>†a</sup> Shi-Meng Ai,<sup>b</sup> Peng Sang,<sup>c</sup> Jing Yang,<sup>a</sup> Yuan-Lin Xia,<sup>a</sup> Zhi-Bi Zhang,<sup>a</sup> Yun-Xin Fu,<sup>a,d\*</sup> Shu-Qun Liu<sup>a\*</sup>

a. State Key Laboratory for Conservation and Utilization of Bio-Resources in Yunnan, Yunnan University, Kunming, P.R. China

b. Department of Applied Mathematics, Yunnan Agricultural University, Kunming, P. R. China

c. College of Agriculture and Biological Science, Dali University, Dali, P. R. China

d. Human Genetics Center and Division of Biostatistics, School of Public Health, the University of Texas Health Science Center, Houston, USA

† These authors contributed equally to this work.

\* Correspondence: Yunxin.Fu@uth.tmc.edu (YXF) shuqunliu@ynu.edu.cn (SQL)

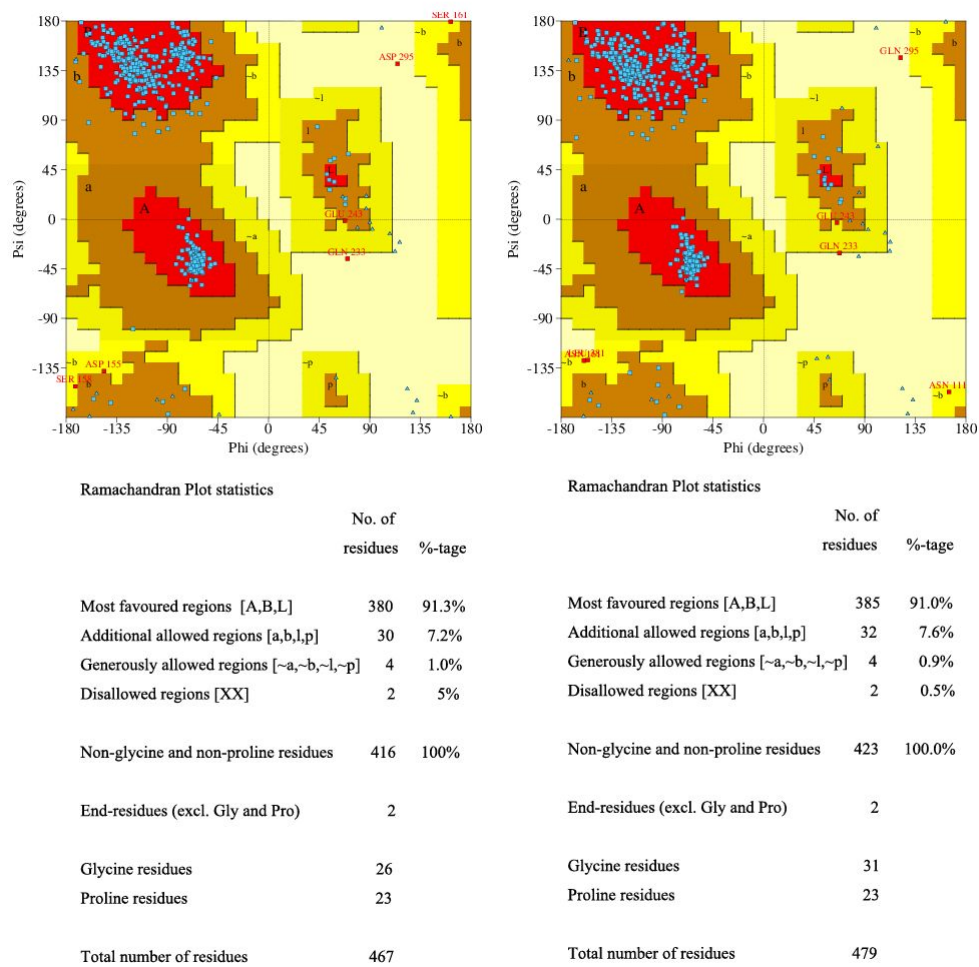

Fig. S1 Ramachandran plots of the constructed structural models of H061.14- (left) and R2-gp120 (right).

Table S1. Validation results of the constructed gp120 structural models (H061.14- and R2-gp120) and template (PDB ID: 5FYJ, chain G).

| Structure or model | PROVE <sup>a</sup> | VERIFY3D <sup>b</sup> |
|--------------------|--------------------|-----------------------|
| 5FYJ, chain G      | 74 (5%)            | 85.26%                |
| H061.14-gp120      | 93 (6.1%)          | 79.66%                |
| R2-gp120           | 101 (6.5%)         | 84.76%                |

<sup>a</sup>The total number of buried outlier protein atoms (percentage is in parentheses).

<sup>b</sup>Percent of the residues had an averaged 3D-1D score  $\geq 0.2$ .
